# Supplementary material for: Sulphur poisoning, water vapour and nitrogen dilution effects on copper-based catalyst dynamics, stability and deactivation during CO2 reduction reactions to methanol
Source: Royal Society of Chemistry journal article supplement (doi:10.1039/d1re00486g), 2022-01-01
Supplement: d1re00486g1.pdf [file d1re00486g1.pdf]

**Sulphur Poisoning, Water Vapour and Nitrogen Dilution Effects on Copper-based Catalyst  
Dynamics, Stability and Deactivation during CO<sub>2</sub> Reduction Reactions to Methanol**

## Supporting information

*Anže Prašnikar, Blaž Likozar\**

Department of Catalysis and Chemical Reaction Engineering, National Institute of Chemistry,  
Hajdrihova 19, 1001 Ljubljana, Slovenia

### 1 Peclet number calculation

The molecular diffusion of all species involved was calculated using equation by Fuller, Schettler and Giddings [S1]:

$$D_{AB} = \frac{10^{-2} T^{1.75} \left( \frac{1}{M_A} + \frac{1}{M_B} \right)^{1/2}}{p_{tot} \left[ \left( \sum_A v_i \right)^{1/3} + \left( \sum_B v_i \right)^{1/3} \right]^2} \left[ \frac{m^2}{s} \right] \quad (S1)$$

The MeOH diffusion coefficient for typical composition (inlet ratio H<sub>2</sub>/CO<sub>2</sub>=3, x(MeOH, H<sub>2</sub>O and CO)=4%,4% and 1% respectively) was calculated using equation by Fairbanks and Wilke[S2].

$$D_{m,i} = \frac{1}{\sum_{j=1, j \neq i}^N \frac{y_j}{D_{ij}}} \quad (S2)$$

The temperature dependence of viscosity was determined using equation (equation S3) of Sutherland[S3]. Since H<sub>2</sub>, CO<sub>2</sub> and N<sub>2</sub> make up the majority of gas phase, we took only those into account. The coefficients of below correlation can be found in Table S1.

$$\eta = \lambda \frac{T^{3/2}}{T + C} \quad (S3)$$

**Table S1. Coefficients for the calculation of viscosity**

| Gas             | C (K) | λ (Pas K <sup>-0.5</sup> ) |
|-----------------|-------|----------------------------|
| H <sub>2</sub>  | 72    | 0.6362 10 <sup>-6</sup>    |
| CO <sub>2</sub> | 240   | 1.572 10 <sup>-6</sup>     |

|                |     |                        |
|----------------|-----|------------------------|
| N <sub>2</sub> | 111 | 1.407 10 <sup>-6</sup> |
|----------------|-----|------------------------|

The gas mixture viscosity was determined using mixing rule[S4]:

$$\eta = \frac{\sum y_i \eta_i (M_i)^{0.5}}{\sum y_i (M_i)^{0.5}} \quad (S4)$$

The axial Peclet number (Pe<sub>ax</sub>) was calculated using equation given by Guedes de Carvalho and Delgado<sup>5,6</sup>. The results are displayed in the table below:

**Table S2. The parameters for calculation of axial Peclet number.**

| T<br>[°C<br>] | P<br>[bar<br>] | H <sub>2</sub> /CO <sub>2</sub><br>inlet ratio | GHSV<br>[1/h] | V(cat-<br>volume)<br>[mL] | Bed<br>porosity<br>[ <i>f</i> ] | d(reactor-<br>diameter)<br>[mm] | d(particle-<br>diameter)<br>[mm] | L(bed-<br>length)<br>[cm] | <b>Peclet (axial<br/>bed H<sub>2</sub>O) [<i>f</i>]</b> | Peclet (axial<br>bed MeOH) [ <i>f</i> ] |
|---------------|----------------|------------------------------------------------|---------------|---------------------------|---------------------------------|---------------------------------|----------------------------------|---------------------------|---------------------------------------------------------|-----------------------------------------|
| 24<br>0       | 50             | 3                                              | 6000          | 1                         | 0.4                             | 6.35                            | 0.3                              | 3.2                       | <b>86</b>                                               | 126                                     |
| 24<br>0       | 20             | 3                                              | 6000          | 1                         | 0.4                             | 6.35                            | 0.3                              | 3.2                       | <b>87</b>                                               | 128                                     |
| 36<br>0       | 20             | 3                                              | 6000          | 1                         | 0.4                             | 6.35                            | 0.3                              | 3.2                       | <b>75</b>                                               | 113                                     |
| 36<br>0       | 50             | 3                                              | 6000          | 1                         | 0.4                             | 6.35                            | 0.3                              | 3.2                       | <b>75</b>                                               | 111                                     |

In the case of H<sub>2</sub>O the rate of convective flow is minimally 75 times higher than the rate of diffusion mass transport meaning that plug flow reactor model can describe process with sufficient accuracy.

## 2 Reaction products-induced deactivation modelling

Equation 1 from the main text in differential form:

$$\int_0^a da(p,t) = \int_0^t a(p,t)^n \left( A_{H_2O} e^{-\frac{E_{a_{H_2O}}}{RT(t)}} p_{H_2O}^m(p,t) + k_{thermal}(T) \right) dt \quad (S5)$$

In difference form:

$$a(p,t) = a(p,t - \Delta t(t)) + a(p,t)^n \left( A_{H_2O} e^{-\frac{E_{a_{H_2O}}}{RT(t)}} p_{H_2O}^m(p,t) + k_{thermal}(T) \right) \Delta t(t) \quad (S6)$$

Here  $\Delta t(t)$  represents the time intervals between GC sampling. Validation by integrating activity part of the equation, while the time derivative was integrated numerically:

Differential form:

$$a(p,t) = \left( 1 - (1-n)A_{H_2O} \int_0^t e^{-\frac{Ea_{H_2O}}{RT(t)}} p_{H_2O}^m(t) dt \right)^{\frac{1}{1-n}} \quad (S7)$$

Numerical form:

$$a(p,t) = \left( 1 - (1-n)A_{H_2O} \sum_{i=0}^{n(t)} e^{-\frac{Ea_{H_2O}}{RT(t)}} p_{H_2O}^m(t) \Delta t(t) \right)^{\frac{1}{1-n}} \quad (S8)$$

In figure below, we can observe that we practically obtain the same results.

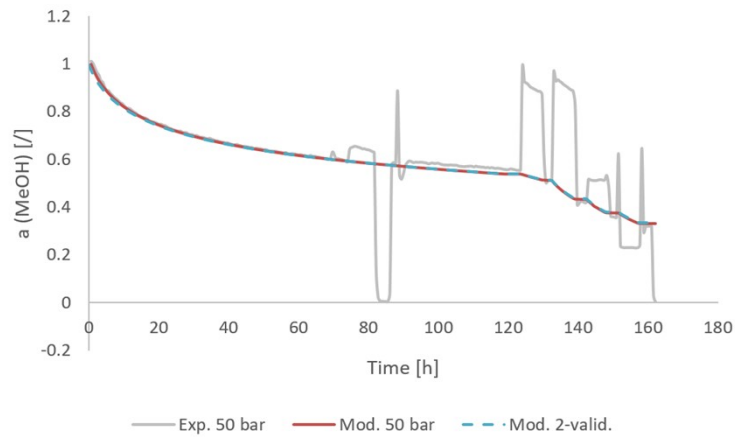

Figure S1. Validation of the model using model equation n. 2 (Eq. S8) using data of CuCeAl test at 50 bar.

Below is a chart of the average ageing composition determination and the estimated error with other methods.

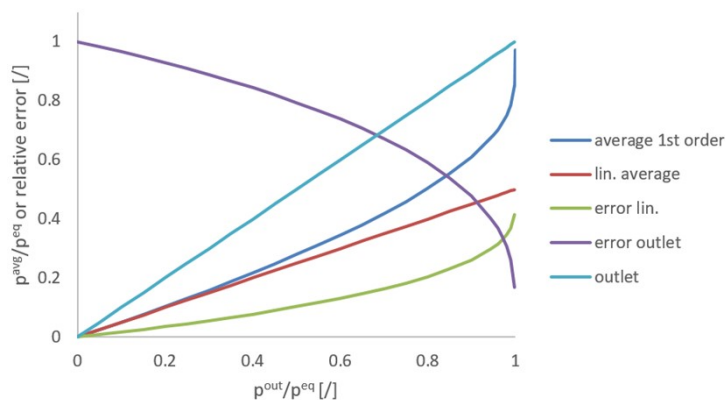

Figure S2. Dark blue line: The average ageing composition in the dependance of  $p^{out}/p^{eq}$ . Red line: Linear average is calculated using inlet and outlet partial pressures. Light blue line: Outlet composition. Green and violet lines are errors estimation based on average 1<sup>st</sup> order line.

### 3 Rietveld refinement

The list of phases can be find in the Table S3.

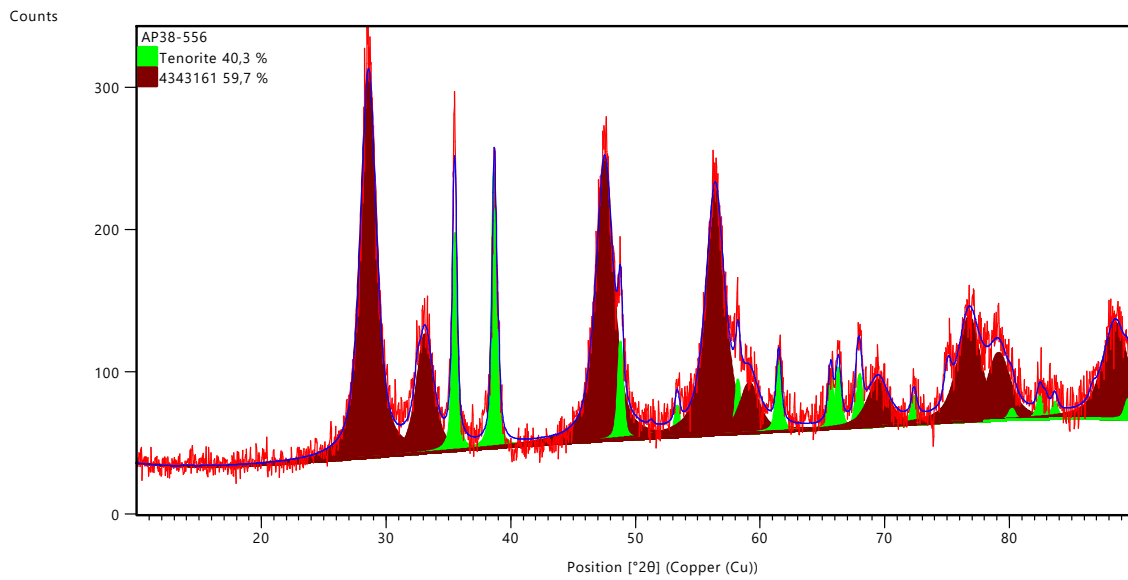

**Figure S3.** Rietveld refinement of XRD diffractogram of CuCeAl sample. Software colours the area starting from low to high angles. In this process smaller peaks can be overshadowed by larger peaks at higher angles. Example is covering of peak at 75° which corresponds to Cu(-222). The fitted line from Rietveld analysis describes the experimental data with sufficient accuracy.

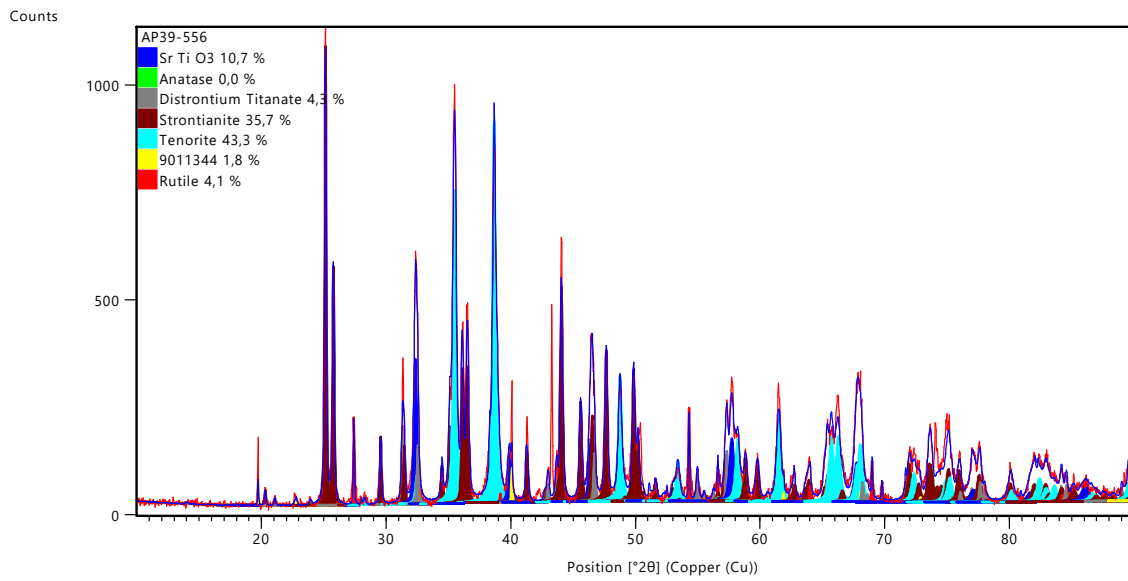

Figure S4. Rietveld refinement of XRD diffractogram of CuSrTi sample.

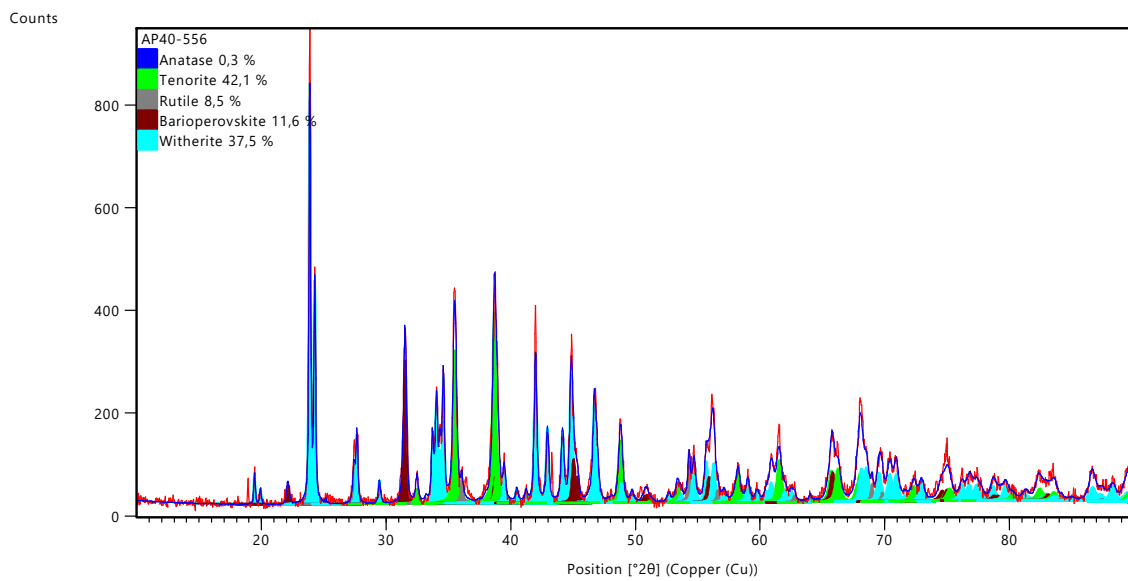

Figure S5. Rietveld refinement of XRD diffractogram of CuBaTi sample.

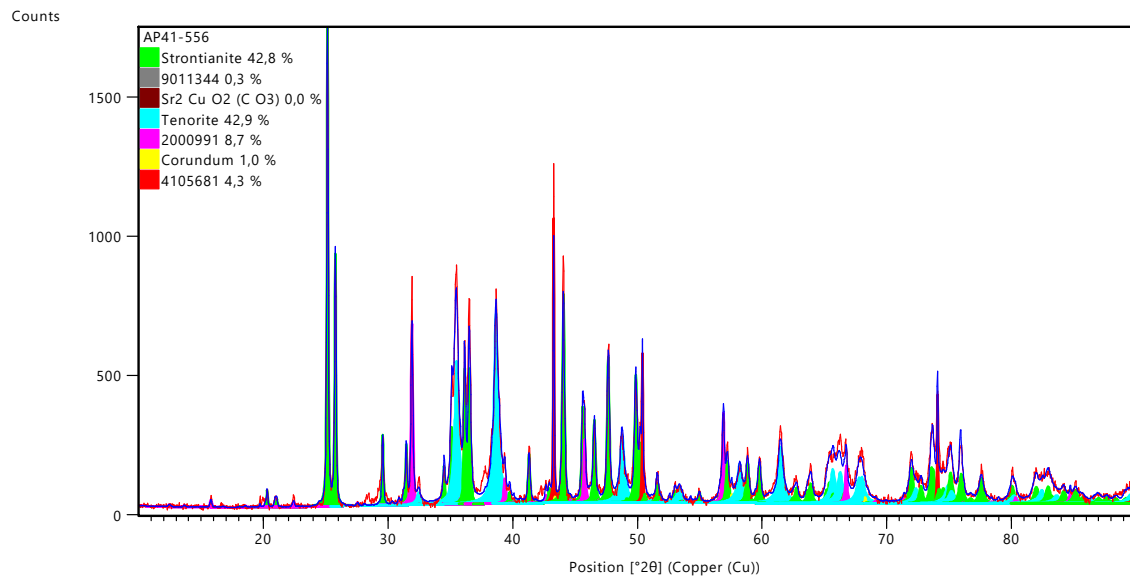

Figure S6. Rietveld refinement of XRD diffractogram of CuSrAl sample.

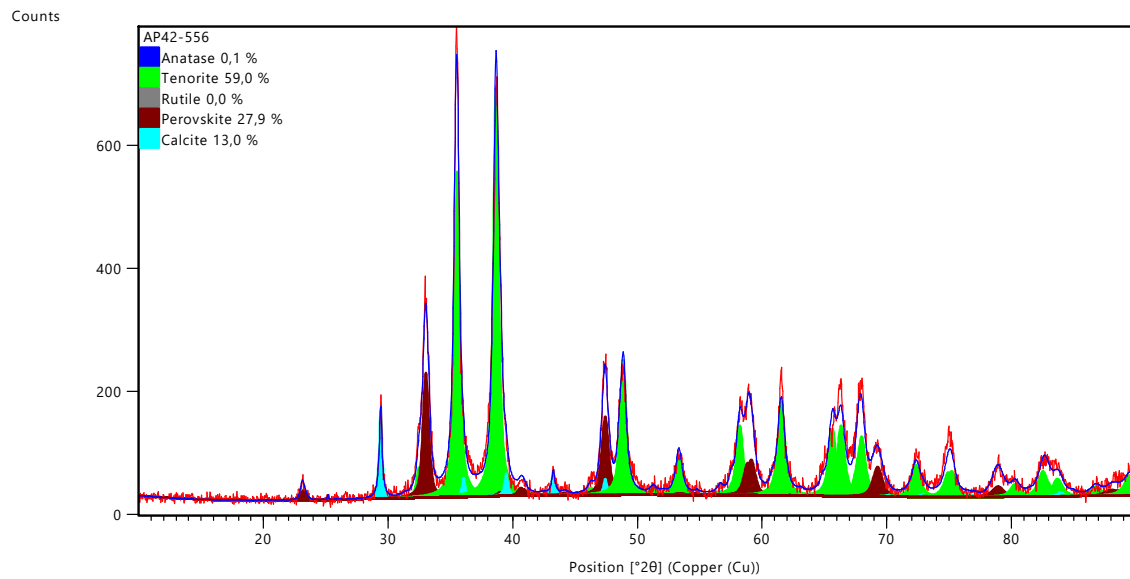

Figure S7. Rietveld refinement of XRD diffractogram of CuCaTi sample.

**Table S3. List of PANalytical X'Pert HighScore Plus references.**

| Name                 | Material                          | Reference code<br>(PANalytical X'Pert HighScore Plus) |
|----------------------|-----------------------------------|-------------------------------------------------------|
| 4343161              | CeO <sub>2</sub>                  | 96-434-3162                                           |
| Tenorite             | CuO                               | 96-901-5925                                           |
| Sr Ti O3             | SrTiO <sub>3</sub>                | 96-231-0688                                           |
| Strontianite         | SrCO <sub>3</sub>                 | 96-901-3803                                           |
| Rutile               | TiO <sub>2</sub>                  | 96-900-9084                                           |
| Anatase              | TiO <sub>2</sub>                  | 96-900-8217                                           |
| Distrontium Titanate | Sr <sub>2</sub> TiO <sub>4</sub>  | 96-151-7789                                           |
| 9011344              | Sr(NO <sub>3</sub> ) <sub>2</sub> | 96-901-1345                                           |
| Barioperovskite      | BaTiO <sub>3</sub>                | 96-901-4775                                           |
| Witherite            | BaCO <sub>3</sub>                 | 96-901-3806                                           |
| 2000991              | SrAl <sub>2</sub> O <sub>4</sub>  | 96-200-0992                                           |
| Corundum             | Al <sub>2</sub> O <sub>3</sub>    | 96-900-9680                                           |
| Perovskite           | CaTiO <sub>3</sub>                | 96-900-2802                                           |
| Calcite              | CaCO <sub>3</sub>                 | 96-901-6707                                           |
| 4105681              | Cu                                | 96-410-5682                                           |

The Rietveld refinement of CuZnAl after reduction can be found in our previous work.<sup>7</sup>

## 4 Effect of nitrogen on methanol synthesis

For determination of nitrogen effect on methanol synthesis we used three different catalysts: CuBaTi, CuCeAl and CuSrTi with three different characteristics. Catalysts CuBaTi and CuSrTi have different strengths of basic sites, while catalyst CuCeAl also contains CeO<sub>x</sub> redox sites. However they all contain copper, which is used in all industrial low-pressure methanol synthesis catalysts. In this way, nitrogen effect could be comprehensively assessed.

Effect of nitrogen concentration in feed gas on concentration of methanol and carbon monoxide was studied under following conditions:

- Pressure: 20 bar
- Temperature: 240 °C
- Constant molar flow rate
- Feed comp.:  $H_2/CO_2 = 3$

Nitrogen concentration was varied between 0, 10 and 30 volume %. Raw data of reactor effluent concentration is shown in Table S4. Effect is shown on Figure S8 for catalyst CuBaTi. Nitrogen concentration was first increased from 0 to 30 vol. % and then decreased gradually back to 0 vol. % by 10 vol. % intervals. Carbon monoxide and methanol concentration in reactor outlet gas followed opposite trend to nitrogen. Both concentrations decreased as nitrogen concentration increased and increased back to almost original value as nitrogen concentration was reduced back to 0 vol. %. Since

carbon monoxide and methanol concentrations after nitrogen addition experiments (Number of experiment 5) are approximately the same as prior to nitrogen addition (Number of experiment 1) it can be concluded that nitrogen presence does not cause irreversible catalyst deactivation. This can be expected because nitrogen molecules are very stable and high pressures and temperatures with presence of appropriate iron catalyst are needed to activate it for combination with hydrogen (Haber-Bosch process). Reaction rates were then normalized to sum of hydrogen and carbon dioxide partial pressures.

**Table S4. Molar fractions of CO, CO<sub>2</sub>, H<sub>2</sub>, H<sub>2</sub>O and CH<sub>3</sub>OH at reactor effluent at 240 °C, 20 bar a and inlet molar ratio of H<sub>2</sub> to CO<sub>2</sub> of 3 at different concentration of nitrogen.**

| N <sub>2</sub> concentration [vol. %] | CO [vol. %] | CO <sub>2</sub> [vol. %] | H <sub>2</sub> [vol. %] | H <sub>2</sub> O [vol. %] | CH <sub>3</sub> OH [vol. %] |
|---------------------------------------|-------------|--------------------------|-------------------------|---------------------------|-----------------------------|
| 0.8                                   | 0.3         | 24.4                     | 74.0                    | 0.8                       | 0.4                         |
| 31.4                                  | 0.2         | 15.2                     | 53.4                    | 0.6                       | 0.2                         |
| 21.5                                  | 0.2         | 17.9                     | 60.2                    | 0.6                       | 0.3                         |
| 11.2                                  | 0.3         | 21.0                     | 67.1                    | 0.7                       | 0.3                         |
| 0.8                                   | 0.3         | 24.4                     | 73.9                    | 0.8                       | 0.4                         |

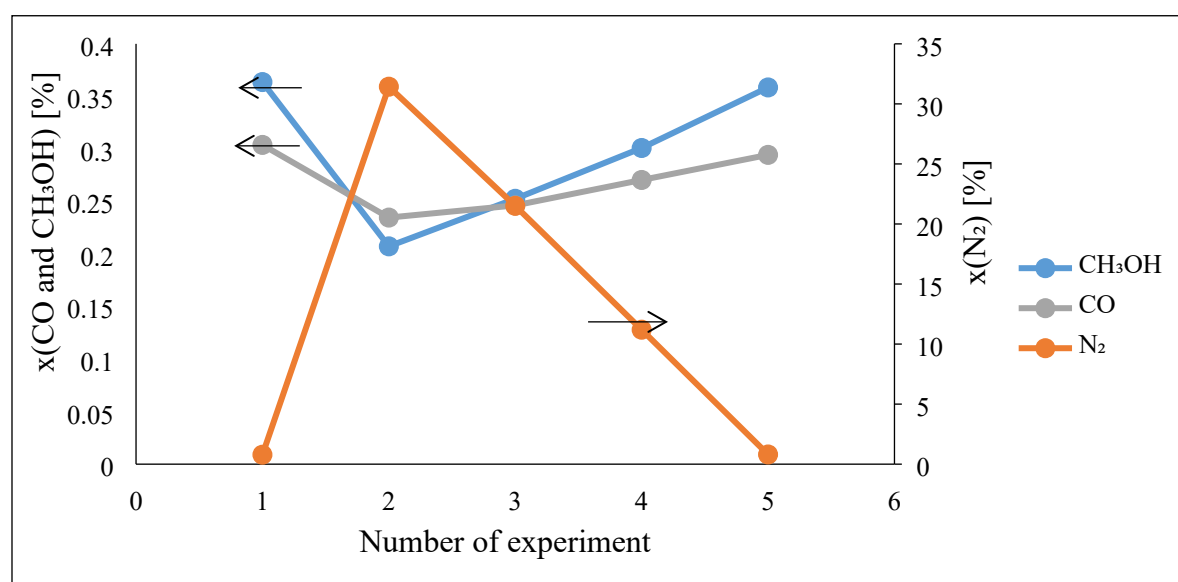

**Figure S8. Effect of nitrogen content on carbon monoxide and methanol outlet molar fraction for CuBaTi.**

Results of normalization are shown on Figure S9 and Figure S10 for methanol and carbon monoxide formation respectively. On average 14 % decrease of methanol production rate and a 10 % increase of carbon monoxide production rate can be observed at nitrogen concentration of 30 vol. %. Trend holds for all three catalyst types studied. Difference between normalized production rates for different could be more attributed to experimental error than to actual difference in catalytic performance. Effect of nitrogen on normalized reaction rates can be explained by effect of chemical equilibrium. Table S5 gives results of equilibrium calculation with Aspen Plus V9 software. Gibbs type reactor with *Calculate phase equilibrium and chemical equilibrium* calculation option selected was used for calculations. Effluent molar flow rates correspond to chemical equilibrium condition. Equilibrium conversion of reactants ( $X_{eq}$ ) from data in is calculated as:



$$X_{eq} = \frac{F_{H_2,f} + F_{CO_2,f} - (F_{H_2,e} + F_{CO_2,e})}{F_{H_2,f} + F_{CO_2,f}} = \frac{3 \frac{kmol}{h} + 1 \frac{kmol}{h} - \left(2.68 \frac{kmol}{h} + 0.82 \frac{kmol}{h}\right)}{3 \frac{kmol}{h} + 1 \frac{kmol}{h}} = 0.125 \quad (S9)$$

where  $F_{H_2,f}$  is molar flow rate of hydrogen at reactor inlet,  $F_{CO_2,f}$  molar flow of carbon dioxide at reactor inlet and  $F_{H_2,e}$ ,  $F_{CO_2,e}$  molar flow rates of hydrogen and carbon dioxide at reactor outlet.

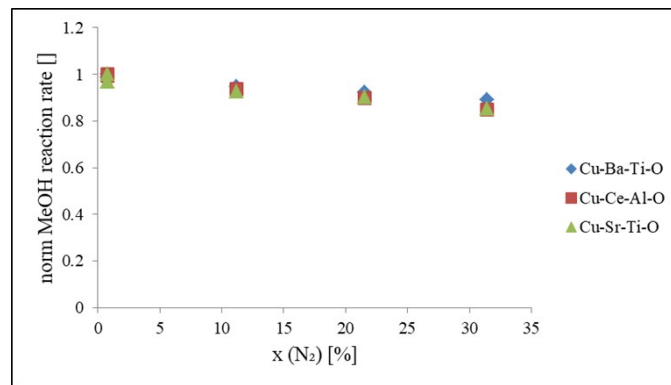

Figure S9. Normalized methanol production rate dependence on nitrogen concentration for CuBaTi, CuCeAl and CuSrTi catalyst.

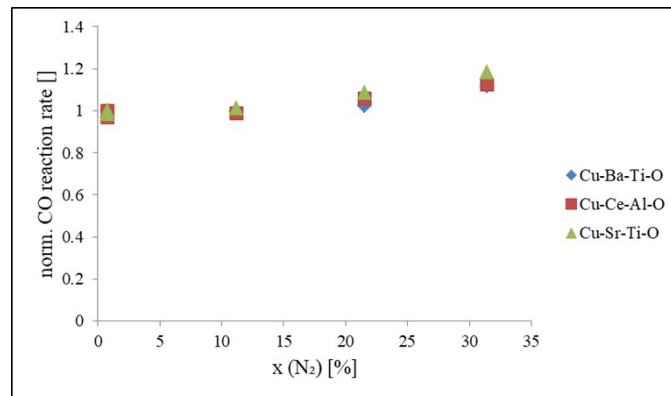

Figure S10. Normalized carbon monoxide production rate dependence on nitrogen concentration for CuBaTi, CuCeAl and CuSrTi catalysts.

Table S5. Equilibrium reactor simulation in Aspen Plus V9 for methanol synthesis reactions.

| Parameter                             | Unit   | Feed | Effluent |
|---------------------------------------|--------|------|----------|
| Temperature                           | °C     | 240  | 240      |
| Pressure                              | bar a  | 20   | 20       |
| Molar flow rate of CO                 | kmol/h | 0    | 0.11     |
| Molar flow rate of CO <sub>2</sub>    | kmol/h | 1    | 0.82     |
| Molar flow rate of CH <sub>3</sub> OH | kmol/h | 0    | 0.07     |
| Molar flow rate of H <sub>2</sub>     | kmol/h | 3    | 2.68     |

|                                     |        |   |      |
|-------------------------------------|--------|---|------|
| Molar flow rate of N <sub>2</sub>   | kmol/h | 0 | 0    |
| Molar flow rate of H <sub>2</sub> O | kmol/h | 0 | 0.18 |

Table S6 gives results of equilibrium conversion, obtained with Aspen Plus V9 simulation as above and conversion calculate by above equation for all four levels of nitrogen concentration studied experimentally. Reaction conditions are 240 °C and 20 bar a.

**Table S6. Dependency of equilibrium conversion of reactants on nitrogen concentration at 240 °C temperature and 20 bar a pressure.**

| Nitrogen concentration [vol.%] | Equilibrium conversion of hydrogen and carbon dioxide [%] |
|--------------------------------|-----------------------------------------------------------|
| 0                              | 12.5                                                      |
| 10                             | 11.9                                                      |
| 20                             | 9.3                                                       |
| 30                             | 9.0                                                       |

It can be clearly seen, that equilibrium conversion falls with increasing nitrogen concentration. Ratio of actual to equilibrium conversions can now be calculated. Actual conversion for stoichiometric composition at reactor inlet and small change of volume due to reaction progress is calculated as:

$$X = \frac{y_{CO} + y_{CH_3OH}}{(1 - y_{N_2})} \quad (S10)$$

where X is conversion (of carbon dioxide),  $y_{CO}$ ,  $y_{CH_3OH}$  and  $y_{N_2}$  are molar fractions of carbon monoxide, methanol and nitrogen. Results are shown in Table S7. Conversions of carbon dioxide ranged from 13.9 % and 15.2 % of equilibrium conversion. Figure S11 shows that with increasing sum of pressure of reactants (carbon dioxide and hydrogen), the equilibrium molar fraction of CO decreases, while CH<sub>3</sub>OH molar fraction raises. Trend of formation rates closely follows trend of equilibrium composition of both methanol and carbon monoxide. Total pressure of reactants, of course, is smaller at given overall total pressure partial pressure of nitrogen is higher.

**Table S7. Ratios between measured CO<sub>2</sub> conversion and equilibrium CO<sub>2</sub> conversion.**

| x(N <sub>2</sub> ) [%] | Conversion(CO <sub>2</sub> )/conversion(CO <sub>2</sub> )-eq [%] |
|------------------------|------------------------------------------------------------------|
| 0.0                    | 14.2                                                             |
| 31.4                   | 15.2                                                             |
| 21.5                   | 14.5                                                             |
| 11.2                   | 14.1                                                             |
| 0.0                    | 13.9                                                             |

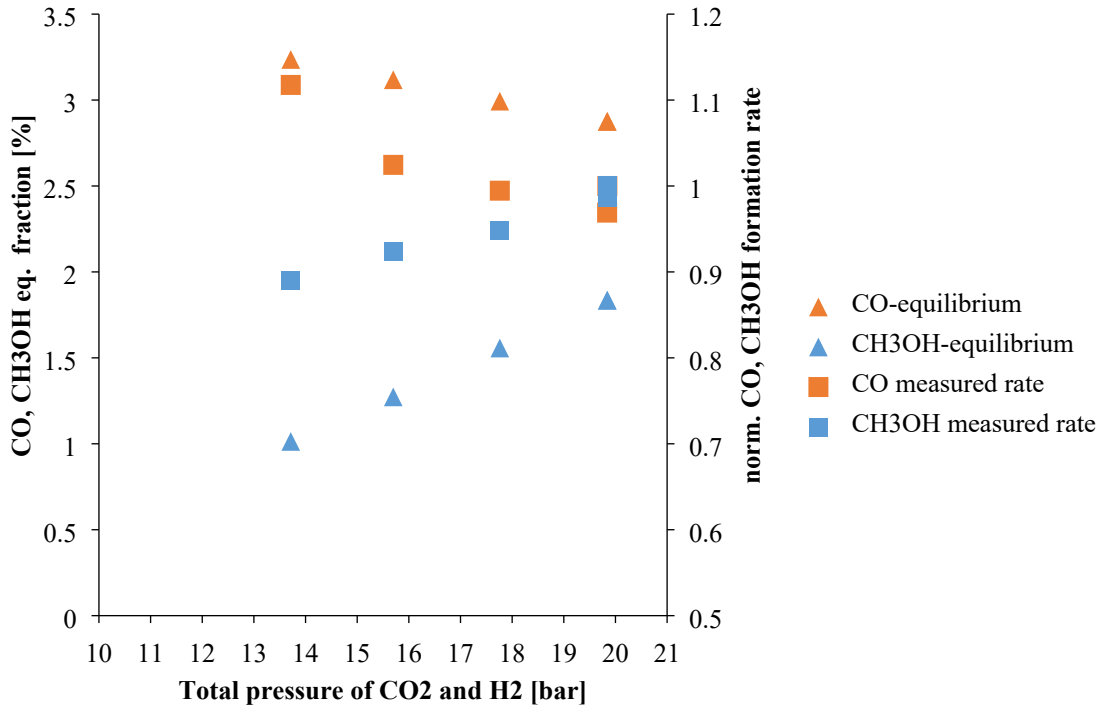

Figure S11. Dependency of equilibrium fractions of carbon monoxide and methanol and formation rate of carbon monoxide and methanol on total pressure of carbon dioxide and hydrogen.

This leads to the explanation that nitrogen only acts as a diluting agent and that the partial pressures of hydrogen and carbon dioxide are important variables for determining methanol and carbon monoxide formation kinetics.

## 5 Calculation of MeOH productivity

The equation also include the flow correction due to decrease the number of mols for MeOH synthesis.

$$MeOH \text{ Productivity} = \frac{GHSV \cdot (1 - 2x_{MeOH}^{out})}{22.4 \text{ L/mol}} \cdot x_{MeOH}^{out} \cdot M_{MeOH} \quad (S11)$$

## 6 References

- 1 E. N. Fuller, P. D. Schettler and J. C. Giddings, *Ind. Eng. Chem.*, 1966, **16**, 551.
- 2 D. F. Fairbanks and C. R. Wilke, *Ind. Eng. Chem.*, 1950, **42**, 471–475.
- 3 W. Sutherland, *Philos. Mag. Ser. 5*, 1893, **36**, 507–531.
- 4 A. Pohar, D. Belavič, G. Dolanc and S. Hočevár, *J. Power Sources*, 2014, **256**, 80–87.
- 5 J. R. F. Guedes de Carvalho and J. M. P. Q. Delgado, *AIChE J.*, 2003, **49**, 1980–1985.
- 6 J. M. P. Q. Delgado, *Heat Mass Transf.*, 2006, **42**, 279–310.
- 7 A. Prašnikar, A. Pavlišič, F. Ruiz-Zepeda, J. Kovač and B. Likozar, *Ind. Eng. Chem. Res.*, 2019, **58**, 13021–13029.
